# Supplementary material
Source: PubMed Central journal article supplement (PMC10584034)

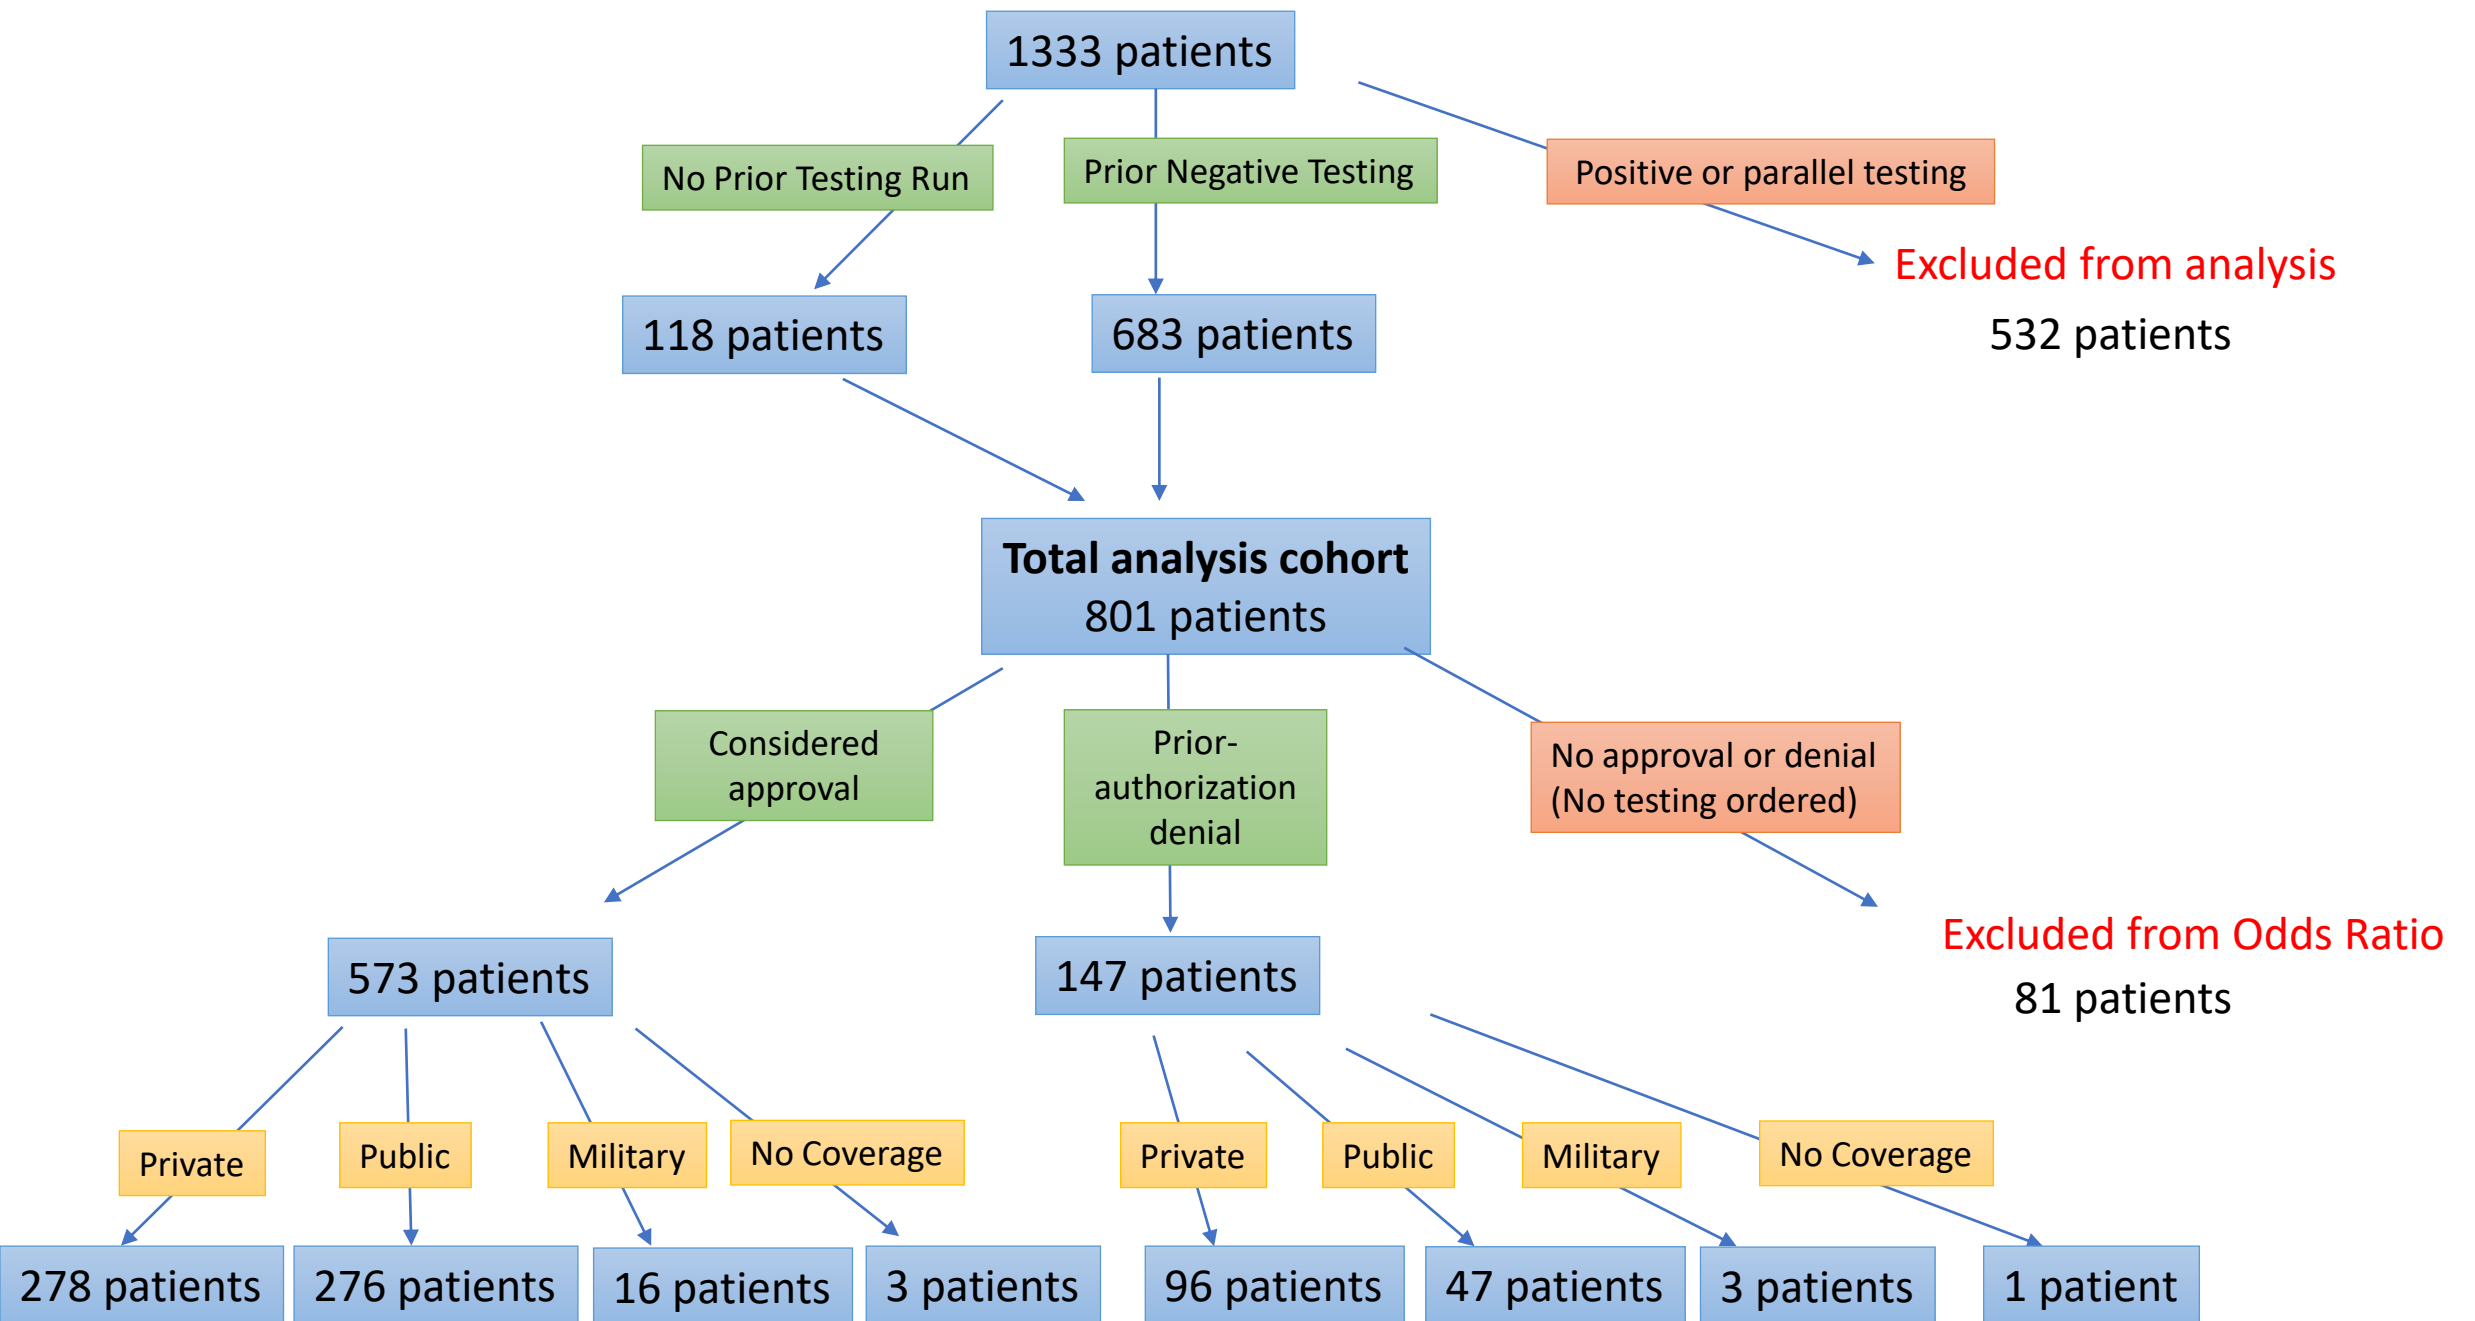

Supplement: NIHMS1933453-supplement-1.pdf [file NIHMS1933453-supplement-1.pdf]
